# Supplementary material for: Monitoring the Recombinant Adeno-Associated Virus Production using Extended Kalman Filter
Source: MDPI journal article supplement (doi:10.3390/pr10112180), 2022-10-25
Supplement: s1 [file s1]

Archive with 1 entries (1 files):
- processes-1845049-supplementary.pdf
