# Supplementary material for: Monitoring the Recombinant Adeno-Associated Virus Production using Extended Kalman Filter
Source: MDPI journal article supplement (doi:10.3390/pr10112180), 2022-10-25
Supplement: s1 [file s1 › processes-1845049-supplementary.pdf]

# **Supplementary Materials: Monitoring the Recombinant Adeno-Associated Virus Production by Extended Kalman Filter**

**Cristovão Freitas Iglesias Jr<sup>1\*</sup>, Xingge Xu<sup>3</sup>, Varun Mehta<sup>1</sup>, Mounia Akassou<sup>2</sup>, Alina Venereo-Sanchez<sup>3</sup>, Nabil Belacel<sup>4</sup>, Amine Kamen<sup>2</sup> and Miodrag Bolic<sup>1</sup>**

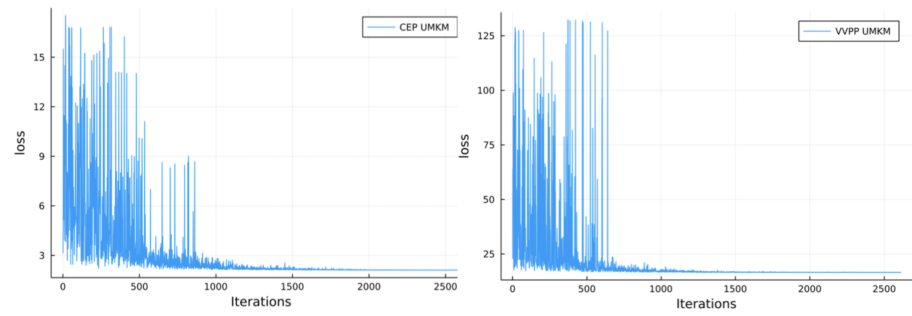

**Figure S1.** Losses of the training process of NODE of cell expansion phase (CEP) (loss minimum around 2) and viral vector production phase (VVPP) kinetic models (loss minimum around 16).

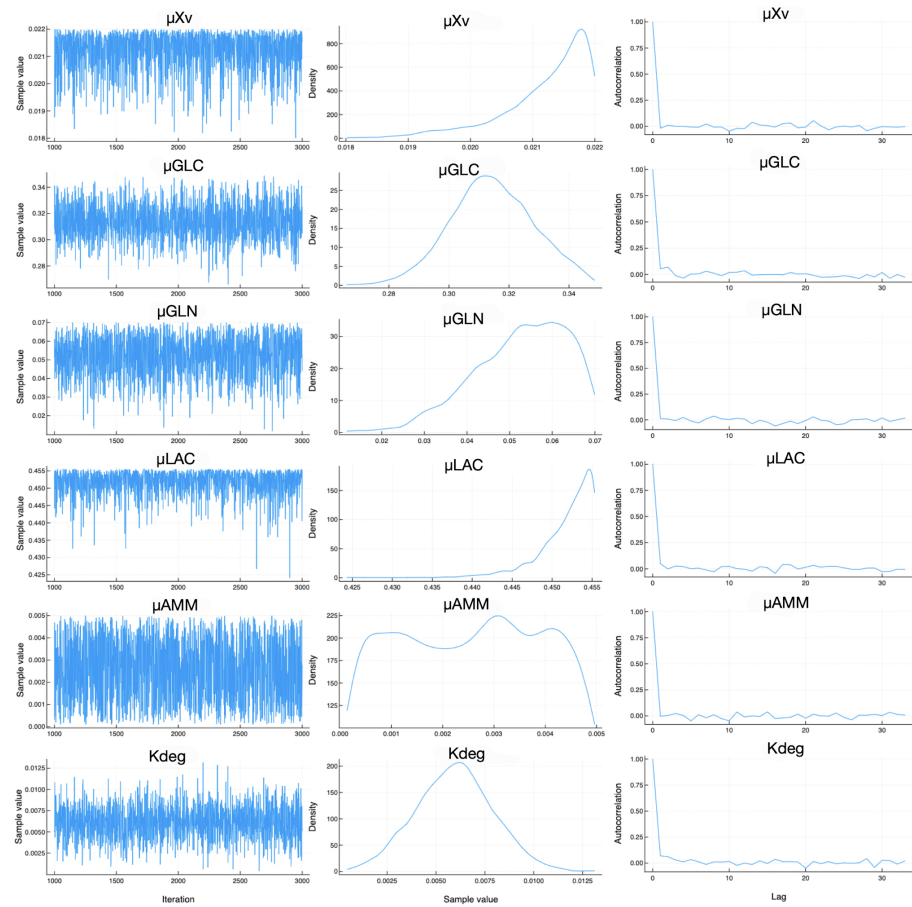

**Figure S2.** Marginal posterior distributions for the parameters of the cell expansion phase (CEP) kinetic model. ACF plot shows auto-correlation in the sampled values decaying away rapidly to zero, indicating that the mixing of the NUTS sampler is good.

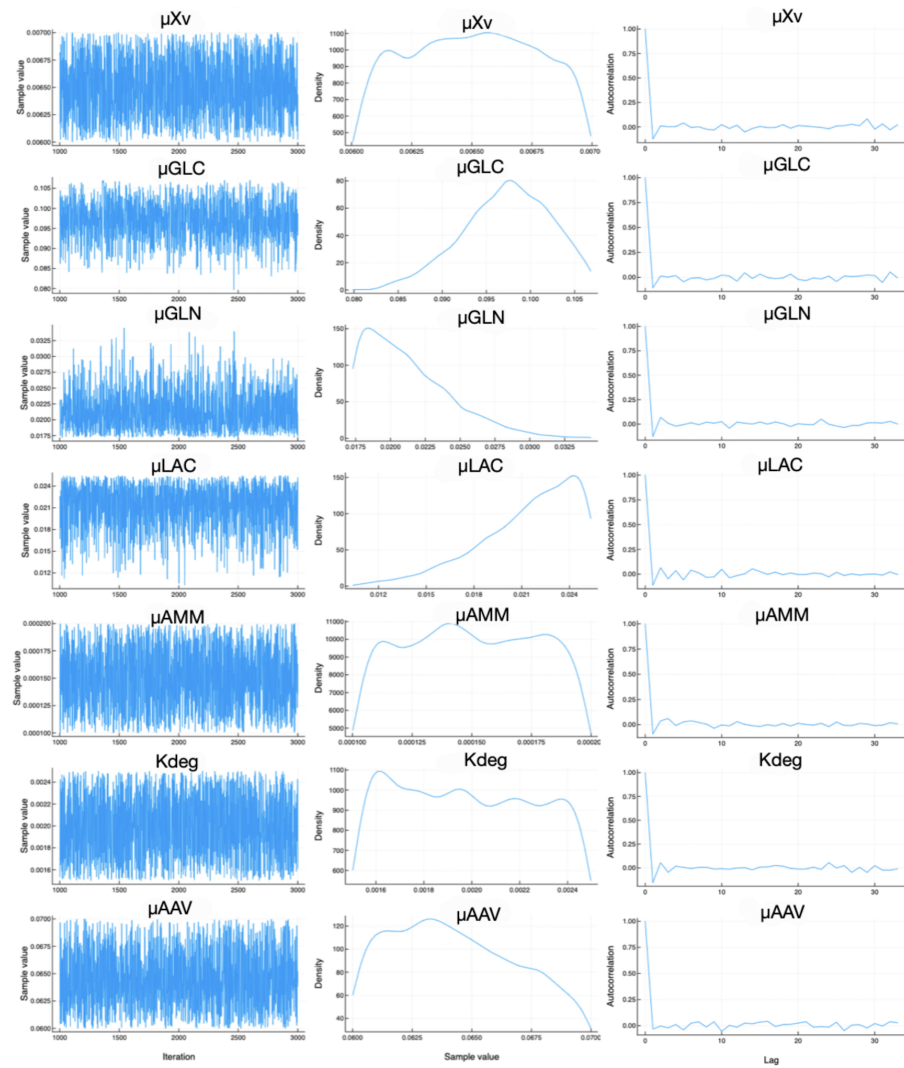

**Figure S3.** Marginal posterior distributions for the parameters of the viral vector production phase (VVPP) kinetic model. ACF plot shows auto-correlation in the sampled values decaying away rapidly to zero, indicating that the mixing of the NUTS sampler is good.
